# Supplementary material
Source: PubMed Central journal article supplement (PMC3549663)
Supplement: NIHMS418614-supplement-03.pdf [file NIHMS418614-supplement-03.pdf]

**Figure 1.** Regional gray matter volumes (GMV) significantly associated with Total Psychopathy Checklist–Youth Version (PCL–YV) scores, controlling for brain volume (BV), age at scan, and substance dependence. Note: These regions are significant in the whole brain at  $p < .05$ , uncorrected for multiple comparisons, with an extent threshold of 1643 voxels, yielding a corrected threshold of  $p < .05$ , accounting for spatial correlations between GMVs in neighboring voxels. Coordinates are in Montreal Neurological Institute (MNI) space. The color bar represents  $t$ -values. GMV increases are in yellow/orange/red and decreases are in green/blue. Negatively associated clusters can be found in the orbitofrontal cortex (OFC), extending into parahippocampal cortex and the temporal poles, and in the posterior cingulate cortex (PCC). There is a positively associated cluster in the prefrontal cortex.

**Figure 2.** Regional gray matter volumes (GMV) negatively associated with the Hare Psychopathy Checklist–Youth Version (PCL–YV) Factor 1 scores (Panel A) and negatively (blue) and positively (red) associated with PCL–YV Factor 2 scores (Panel B), controlling for brain volume (BV), age at scan, and substance dependence. Note: These regions are significant in the whole brain at  $p < .05$  and 1643-voxel extent. Numeric values indicate the Montreal Neurological Institute (MNI) z-coordinate of the slice, and the color bar represents  $t$ -values.

**Figure S1.** Distribution of Psychopathy Checklist–Youth Version (PCL–YV) Total scores ( $n=191$ ).

**Figure S2.** Regional gray matter volumes significantly associated with Total Psychopathy Checklist–Youth Version (PCL–YV) scores, controlling for brain volume (BV), age at scan, and regular substance use. Note: These regions are significant in the whole brain at  $p < .05$ , uncorrected for multiple comparisons, with an extent threshold of 1,643 voxels, yielding a corrected threshold of  $p < .05$ , accounting for spatial correlations between gray matter volumes (GMVs) in neighboring voxels. Coordinates are in Montreal Neurological Institute (MNI) space. The color bar represents  $t$ -values.

**Table 1.** Descriptive statistics for analyzed sample ( $N=191$ ).

**Table S1.** Zero-order correlations (and two-tailed  $p$ -values) among Psychopathy Checklist–Youth Version (PCL-YV) Total, Factor 1 scores, Factor 2 scores, and control variables.

| Variable                | n   | Total Scores | Factor 1 Scores | Factor 2 Scores |
|-------------------------|-----|--------------|-----------------|-----------------|
| IQ                      | 178 | -.04 (.63)   | .10 (.21)       | -.13 (.08)      |
| TBI History             | 191 | .08 (.63)    | .02 (.88)       | .09 (.20)       |
| TBI Duration            | 188 | .10 (.16)    | .03 (.68)       | .13 (.09)       |
| Handedness <sup>a</sup> | 191 | -.03 (.64)   | -.05 (.49)      | -.001 (.99)     |
| Substance Dependence    | 191 | .24 (.001)   | .17 (.02)       | .24 (.001)      |
| Regular Use             | 184 | .37 (<.001)  | .25 (<.001)     | .37 (<.001)     |
| Age at scan             | 191 | -.12 (.10)   | -.03 (.70)      | -.17 (.02)      |
| Brain Volume            | 191 | -.01 (.92)   | <.001 (.997)    | -.004 (.95)     |
| Gray Matter Volume      | 191 | -.01 (.94)   | -.004 (.95)     | -.003 (.97)     |
| White Matter Volume     | 191 | -.01 (.91)   | .005 (.95)      | -.005 (.94)     |

Note: The two substance use measures, substance dependence and regular use, were significantly positively correlated,  $r=.48$ ,  $p<.001$ . As is typical<sup>1,2</sup>, Factor 1 and Factor 2 scores were significantly positively correlated,  $r=.52$ ,  $p<.001$ . TBI=traumatic brain injury.

<sup>a</sup>Spearman's rho.

**Table S2.** Negative associations between Total Psychopathy Checklist–Youth Version (PCL-YV) scores and gray matter volumes (GMV) in anatomical regions of interest (ROI) using small volume correction (SVC).

|                       |   | Gray Matter Volumes |     |     |      |             |
|-----------------------|---|---------------------|-----|-----|------|-------------|
|                       |   | MNI Coordinates     |     |     |      |             |
| Paralimbic Region     | H | x                   | y   | z   | t    | FWE         |
| Lateral OFC           | L | -12                 | 32  | -24 | 4.23 | <b>.007</b> |
|                       | R | 12                  | 18  | -18 | 3.24 | .134        |
| Medial OFC            | — | -10                 | 32  | -22 | 4.15 | <b>.004</b> |
| ACC                   | — | 6                   | 26  | 18  | 2.20 | .647        |
| Temporal Pole         | L | -32                 | 8   | -30 | 3.32 | <i>.069</i> |
|                       | R | 42                  | 16  | -22 | 3.04 | <i>.156</i> |
| Parahippocampal Gyrus | L | -16                 | 6   | -20 | 2.59 | .218        |
|                       | R | 20                  | 8   | -20 | 3.12 | <i>.076</i> |
| Amygdala              | L | -16                 | 2   | -16 | 2.57 | <i>.070</i> |
|                       | R | 20                  | 6   | -18 | 2.57 | <i>.076</i> |
| Hippocampus           | L | -16                 | -4  | -22 | 1.97 | .524        |
|                       | R | 26                  | -4  | -22 | 2.33 | .337        |
| PCC                   | — | 4                   | -46 | 12  | 2.36 | .294        |

Note: Brain volume (BV), age at scan, and regular substance use were included in the model as covariates. Montreal Neurological Institute (MNI) x, y, and z coordinates, *t*-values, and family wise error rate (FWE) *p*-values are for the peak voxel in each region. Significant regions ( $p < .05$ ) are indicated in **bold** and marginal regions ( $p < .10$ ) are indicated in *italics*. ACC=anterior cingulate cortex; H=Hemisphere; L=Left; OFC=orbitofrontal cortex; PCC=posterior cingulate cortex; R=Right.

**Table S3.** Negative associations between Total Psychopathy Checklist–Youth Version (PCL-YV) scores and gray matter volumes (GMV) in regions of interest (ROI) using small volume correction (SVC; 10mm diameter spheres).

| Region          | H | Peak for Search<br>(from adults) |     |     | Peak within Volume |     |     | t-value | p (unc.) | FWE         |
|-----------------|---|----------------------------------|-----|-----|--------------------|-----|-----|---------|----------|-------------|
|                 |   | x                                | y   | z   | x                  | y   | z   |         |          |             |
| Lateral OFC     | L | -26                              | 32  | -20 | -26                | 28  | -22 | 2.48    | .007     | <b>.053</b> |
|                 | R | 28                               | 48  | -18 | 24                 | 46  | -16 | 2.60    | .005     | <b>.042</b> |
| Medial OFC      | — | 4                                | 52  | -20 | 2                  | 52  | -24 | 1.53    | .062     | .247        |
| ACC             | — | -2                               | 48  | 2   | 2                  | 46  | 0   | -1.06   | .575     | .629        |
| Temporal Pole   | L | -38                              | 12  | -40 | -40                | 8   | -38 | 2.51    | .006     | <b>.050</b> |
|                 | R | 34                               | 20  | -38 | 36                 | 16  | -36 | 1.88    | .030     | .156        |
| Parahippocampal | L | -32                              | -2  | -28 | -34                | 2   | -30 | 2.40    | .009     | <i>.062</i> |
|                 | R | 34                               | -8  | -24 | 32                 | -10 | -20 | 0.48    | .270     | .519        |
| PCC             | — | -6                               | -54 | 32  | -8                 | -52 | 28  | 1.95    | .026     | .141        |

Note: Brain volume (BV), age at scan, and regular substance use were included in the model as covariates. Montreal Neurological Institute (MNI) x, y, and z coordinates, t-values, and p-values are for the peak voxel in each region. Significant regions ( $p < .05$ ) are indicated in **bold** and marginal regions ( $p < .10$ ) are indicated in *italics*. Search coordinates based on an independent adult sample<sup>3</sup> (N=254). ACC=anterior cingulate cortex; FWE=family wise error rate; H=Hemisphere; L=Left; OFC=orbitofrontal cortex; PCC=posterior cingulate cortex; R=Right; unc.=uncorrected.

## Supplemental References

1. Hare RD. Manual for the Hare Psychopathy Checklist-Revised. 2<sup>nd</sup> ed. Toronto: Multi-Health Systems; 2003.
2. Hare RD. Manual for the Hare Psychopathy Checklist: Toronto: Multi-Health Systems; 1991.
3. Ermer E, Cope LM, Nyalakanti PK, Calhoun VD, Kiehl KA. Aberrant paralimbic gray matter in criminal psychopathy. *J Abnorm Psychol.* 2012;121:649–658.
